# Supplementary material for: Characterization and study of luminescence enhancement behaviour of alginate-based hydrogels
Source: Royal Society of Chemistry journal article supplement (doi:10.1039/c8nj03004a), 2018-01-01
Supplement: c8nj03004a1.pdf [file c8nj03004a1.pdf]

**Electronic Supplementary Material (ESI) for New Journal of Chemistry.**

This journal is © The Royal Society of Chemistry 2018

**Characterization and Study of Luminescence Enhancement Behaviour of Alginate-  
Based Hydrogel**

Mengmeng Kang,<sup>a</sup> Olayinka Oderinde,<sup>a</sup> Yaoyao Deng,<sup>a</sup> Shunli Liu,<sup>a</sup> Fang Yao,<sup>a</sup> and Guodong Fu<sup>\*a</sup>

*School of Chemistry and Chemical Engineering, Southeast University, Jiangning District, Nanjing, Jiangsu Province,  
China 211189.*

\* To whom correspondence should be addressed:

Tel.: +86-25-52090625; Fax: +86-25-52090625

Email: 101010855@seu.edu.cn

**S1. Preparation of spherical SA-Tb (III) hydrogel**

SA solutions (4%, wt.%) was carefully dropped into Tb<sup>3+</sup> solution (0.01 M) and SSA-Tb<sup>3+</sup> solution (Tb<sup>3+</sup> 0.01 M, SSA 0.03 M), respectively, using a syringe., while the hydrogels were fabricated after 12 h. Thereafter the as-fabricated hydrogels were subsequently immersed in deionized water several times to remove the unreacted ions. As shown in **Fig.S1**, both the hydrogel exhibited luminescence under UV light irradiation, with the one with SSA exhibiting stronger green light.

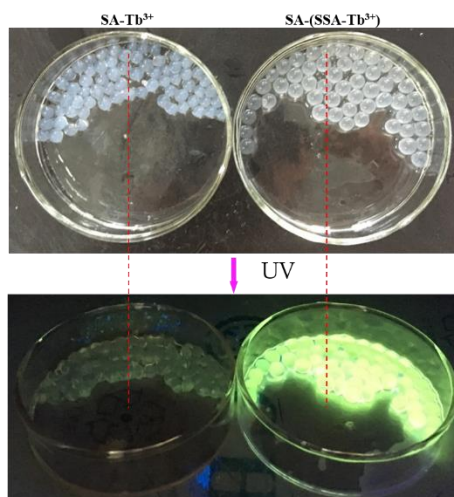

**Fig.S1** Spherical SA-Tb (III) hydrogel (left) and spherical SA-(SSA-Tb(III)) hydrogel (right) with (lower) and without UV irradiation (upper).

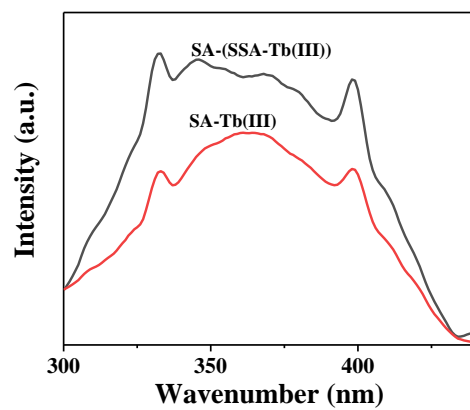

**Fig. S2** Excitation spectrum of hydrogels SA-Tb (III) and SA-(SSA-Tb(III)) at an emission wavelength of 544 nm, respectively.

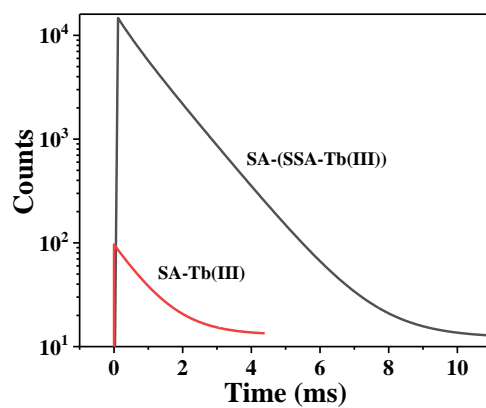

**Fig. S3** Luminescence decay curves of samples measured at room temperature using an excitation of 350 nm and monitored around the most intense emission line at 544 nm.
